# Supplementary material for: Direct grafting of tetraaniline via perfluorophenylazide photochemistry to create antifouling, low bio-adhesion surfaces
Source: PubMed Central journal article supplement — Chem Sci. 2019 Mar 13;10(16):4445–57. doi: 10.1039/c8sc04832k (PMC6487792; doi:10.1039/c8sc04832k), 2019-03-13
Supplement: SC-010-C8SC04832K-s001.pdf [file SC-010-C8SC04832K-s001.pdf]

## *Supporting Information*

### **Direct Grafting of Tetraaniline via Perfluorophenylazide Photochemistry to Create Antifouling, Low Bio-adhesion Surfaces**

Cheng-Wei Lin<sup>1‡</sup>, Stephanie Aguilar<sup>1‡</sup>, Ethan Rao<sup>1,2</sup>, Wai H. Mak<sup>1</sup>, Xinwei Huang<sup>1</sup>, Na He<sup>1,2</sup>, Dayong Chen<sup>1</sup>, Dukwoo Jun<sup>3</sup>, Paige A. Curson<sup>1</sup>, Brian T. McVerry<sup>1,2</sup>, Eric M. V. Hoek<sup>4</sup>, Shu-Chuan Huang<sup>5\*</sup> and Richard B. Kaner<sup>1,6\*</sup>

<sup>1</sup> Department of Chemistry and Biochemistry and California NanoSystems Institute, University of California, Los Angeles, Los Angeles, California 90095, USA

<sup>2</sup> Hydrophilix, Inc., 12100 Wilshire Blvd, Suite 800, Los Angeles, CA 90025

<sup>3</sup> Green Technology Center, Jung-gu, Seoul, 04554, Republic of Korea

<sup>4</sup> Department of Civil and Environmental Engineering, University of California, Los Angeles, Los Angeles, California 90095, USA

<sup>5</sup> Department of Chemistry, National Dong Hwa University, Shoufeng, Hualien 97401, Taiwan

<sup>6</sup> Department of Materials Science and Engineering and California NanoSystems Institute, University of California, Los Angeles, Los Angeles, California 90095, USA

‡ These two authors contribute equally to this work.

\*Corresponding authors: [kaner@chem.ucla.edu](mailto:kaner@chem.ucla.edu), [schuang@gms.ndhu.edu.tw](mailto:schuang@gms.ndhu.edu.tw)

#### **Supporting Information**

The measured I-V curve of pristine PET film, the MALDI-TOF spectrum of synthesized tetraaniline, the microscope images of surface coverage of *Staphylococcus epidermidis* on unmodified and modified PET films, stability of the modified PES membrane, and the atomic force microscope images showing topologies of unmodified and modified PES membranes are provided in the Supporting Information at DOI:

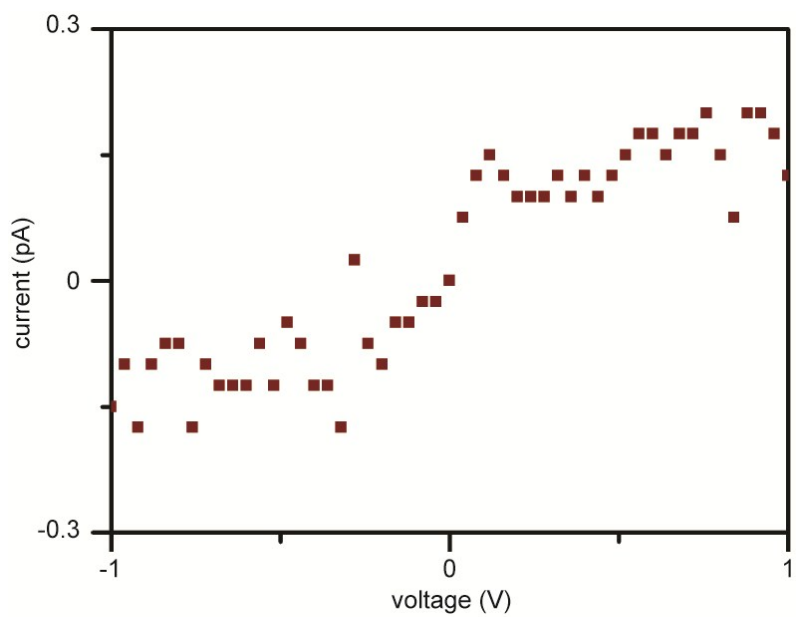

**Figure S1.** The I-V characteristic of the unmodified PET film.

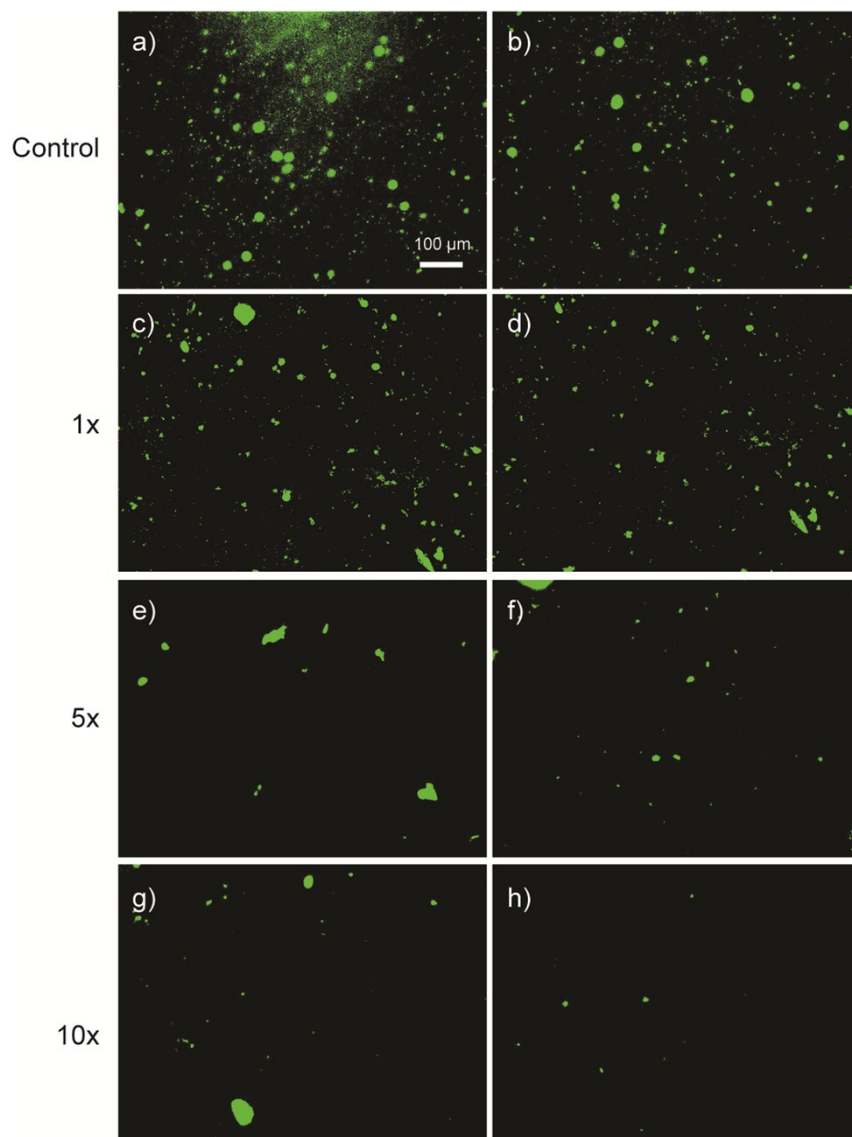

**Figure S2.** Microscopic images showing the surface coverage of *Staphylococcus epidermidis* on the (a, b) unmodified, (c, d) 1, (e, f) 5, and (g, h) 10 times modified PET films.

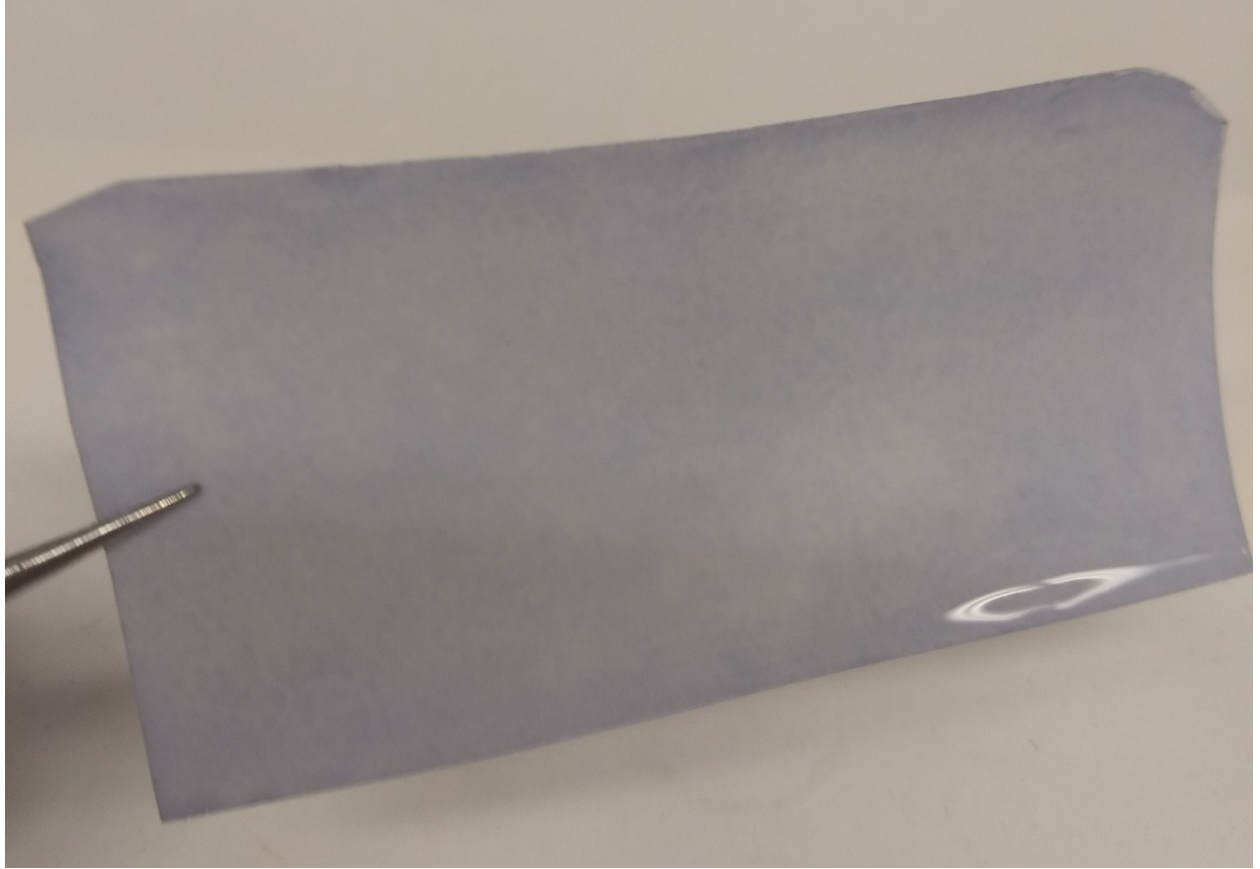

**Figure S3.** Photo showing a modified PES membrane which has been kept in water for almost one year.

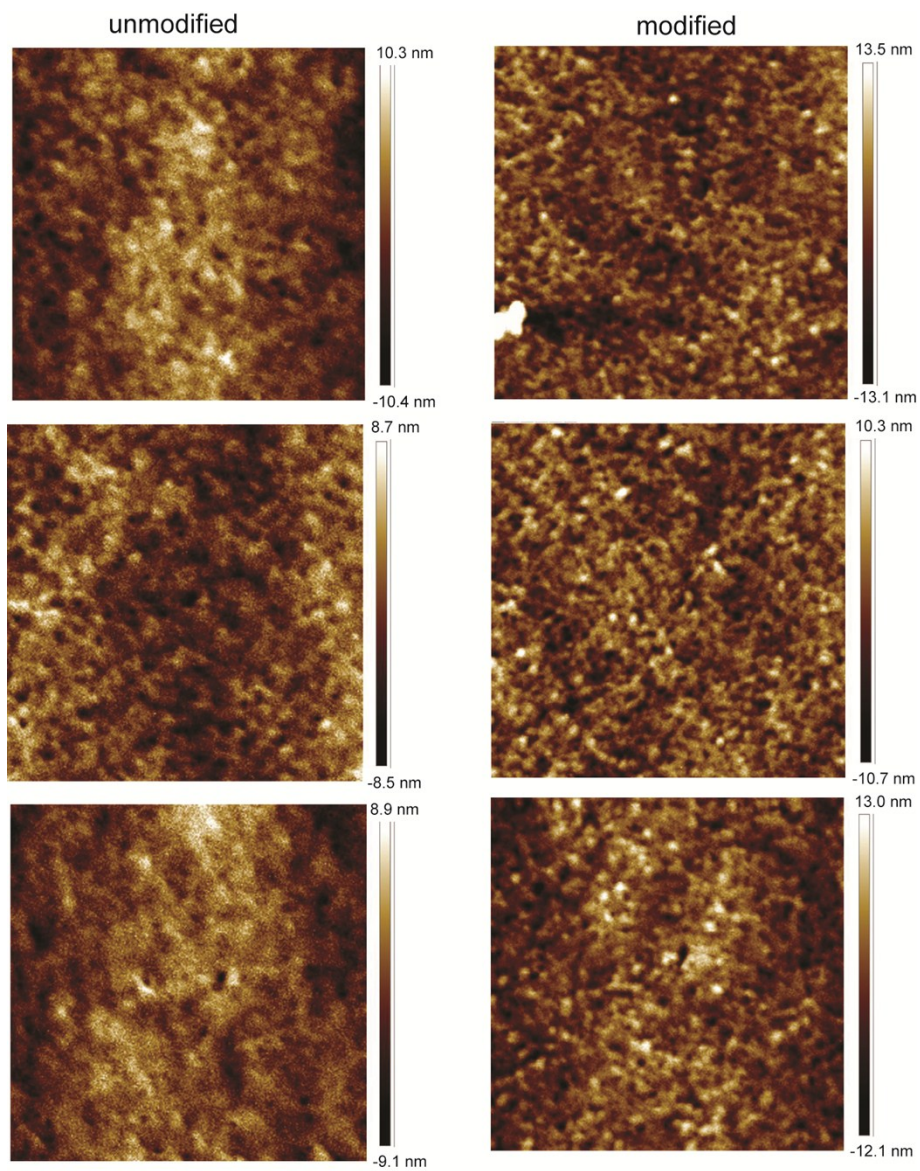

**Figure S4.** Atomic force microscope images showing topologies of (left column) unmodified, and (right column) modified PES membranes.

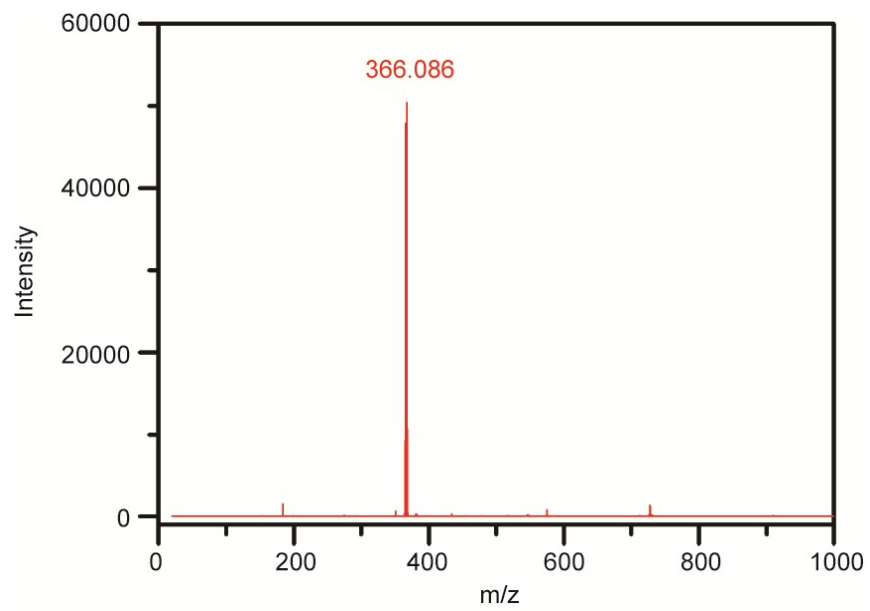

**Figure S5.** MALDI-TOF spectrum showing the molar mass of synthesized TANI.
